# Supplementary material
Source: ML conference proceedings conference paper supplement (https://proceedings.neurips.cc/paper_files/paper/2023/hash/bf73c283ed3108ee9f84da2e29bcc336-Abstract.html)
Supplement: Supplementary file 1 [file bf73c283ed3108ee9f84da2e29bcc336-Supplemental-Conference.pdf]

428 **Supplementary Material**  
 429 **“Do Not Marginalize Mechanisms, Rather Consolidate!”**

430 **A Evaluation of Partitioned SCM**

431 A partitioned SCM  $\mathcal{M}_{\mathcal{A}}$  consists of several sub SCM  $\mathcal{M}_{\mathbf{A}}$ , that, in sum, cover all variables and  
 432 structural equations of an initial SCM  $\mathcal{M}$ . Thus, evaluation of a partitioned SCM yields the same set  
 433 of values  $\mathbf{v} \in \mathbf{V}$  as the original  $\mathcal{M}$ . Similar to the evaluation of structural equation in the initial  $\mathcal{M}$ ,  
 434 sub SCM need to be evaluated in a specific order to guarantee all  $\mathbf{u} \in \mathcal{M}'_{\mathbf{U}}$  exist. As such, sub SCM  
 435 can be considered multivariate variables that establish another high-level DAG. The evaluation order  
 436 is determined via the relation  $R_{\mathbf{X}}$  as defined in Sec. 3.1 and depends on the graph partition  $\mathcal{A}$  and the  
 437 order of  $\mathbf{X}$  imposed by the the initial SCM.

---

**Algorithm 1** Evaluation of partitioned SCM

---

```

1: procedure PARTITIONEDSCMEVAL( $\mathcal{M}_{\mathcal{A}}, \mathbf{u}, \mathbf{I}$ )
2:    $\mathbf{x} \leftarrow \mathbf{u}$  ▷  $\mathbf{x}$  will gradually collect all values  $\mathbf{x} \in \mathbf{X}$  of  $\mathcal{M}$ 
3:   for  $\mathbf{A}$  in sort( $\mathcal{A}, R_{\mathbf{X}}$ ) do ▷ Sort Clusters by strict partial order imposed by  $\mathcal{M}$ 
4:      $\mathcal{M}'_{\mathbf{A}} \leftarrow \mathcal{M}'_{\mathbf{A}'} \in \mathcal{M}_{\mathcal{A}}$  where  $\mathbf{A}' = \mathbf{A}$ 
5:      $\mathbf{u}' \leftarrow \{x_i \in \mathbf{x} \mid \mathbf{X}_i \in \mathcal{M}'_{\mathbf{U}}\}$ 
6:      $\mathbf{I}' \leftarrow \psi_{\mathbf{A}}(\mathbf{I})$ 
7:      $\mathbf{v} = \mathcal{M}'_{\mathbf{A}}(\mathbf{u}')$ 
8:      $\mathbf{x} = \mathbf{x} \cup \mathbf{v}$ 
9:   end for
10:   $\mathbf{v} = \{x_i \in \mathbf{x} \mid \mathbf{X}_i \in \mathcal{M}'_{\mathbf{V}}\}$  ▷ Filter all  $\mathbf{u} \in \mathbf{U}$  to get  $\mathbf{v} \in \mathbf{V}$ 
11:  return  $\mathbf{v}$ 
12: end procedure

```

---

438 Algorithm 1 shows the evaluation of partitioned SCM, where  $\mathcal{M}_{\mathcal{A}}$  is the partitioned SCM we want to  
 439 evaluate,  $\mathbf{u}$  are the values of exogenous variables to the initial model  $\mathcal{M}$  and  $\mathbf{I}$  is the set of applied  
 440 interventions. The outcomes of sub SCM that are not related via  $R_{\mathbf{X}}$  are invariant to the evaluation  
 441 order among each other. Even though  $R_{\mathbf{X}}$  defines the ordering of sub SCM only up to some partial  
 442 order, sort( $\mathcal{A}, R_{\mathbf{X}}$ ) can pick any total ordering that is valid with  $R_{\mathbf{X}}$ .

443 **Proof 1 (Consistency of Partitioned SCM Evaluation)** *Evaluations of  $\mathcal{M}'_{\mathbf{A}}$  every, in step 7, com-*  
 444 *pute all variables  $\mathbf{V}_i \in \mathbf{A}$  by evaluating  $f_i$  of the original SCM, yielding the same values as the*  
 445 *evaluation of  $\mathbf{A}$  in  $\mathcal{M}$ . Therefore  $P_{\mathcal{M}'_{\mathbf{A}}} = P_{\mathcal{M}_{\mathbf{A}}}$ . By Def. 4 every variable  $V \in \mathbf{V}$  is contained*  
 446 *within some sub SCM  $\mathcal{M}'_{\mathbf{A}}$ . The evaluation of PartitionedSCMEval is complete, in the sense that*  
 447 *all  $\mathbf{V} = \bigcup \mathcal{A} = \bigcup_{\mathbf{A} \in \mathcal{A}} \mathbf{A}$  are evaluated, as the evaluation of all  $\mathcal{M}'_{\mathbf{A}} \in \mathcal{M}_{\mathcal{A}}$  is guaranteed by*  
 448 *iterating over all  $\mathbf{A}$  in step 2. Finally  $P_{\mathcal{M}'_{\mathbf{A}}} = \bigcup_{\mathbf{A} \in \mathcal{A}} P_{\mathcal{M}'_{\mathbf{A}}} = \bigcup_{\mathbf{A} \in \mathcal{A}} P_{\mathcal{M}_{\mathbf{A}}} = P_{\mathcal{M}_{\mathbf{V}}}$ . ■*

449 **B Complexity reduction in function composition**

450 Reduction of encoding length might vary depending on the type and structure of the equations under  
 451 consideration. No compression of structural equation is gained when the system of consolidated  
 452 equations is already minimal. Compression of equation to an identity function is showcased in the  
 453 following.

454 **B.1 Compression of chained inverses**

455 Reduction to constant complexity for the unintervened system is reached in the case of  $f_B = f_A^{-1}$ .  
 456 Consider the equation chain of  $X \rightarrow A \rightarrow B$  with  $A$  getting marginalized. Immediately  $f'_B :=$   
 457  $f_B \circ f_A = f_A^{-1} \circ f_A = \text{Id}$  follows. Therefore,  $B := X$ , which is a single assignment of the value(s)  
 458 of  $X$  into  $B$ . Remaining complexity within the consolidated function is then only due to conditional  
 459 branching in cases of  $do(A = a), do(B = b) \in \mathbf{I}$ .

460 **B.2 Matrix composition is not sufficient for compressing equations**

461 The operation of matrix multiplication, as a way of expressing composition of linear functions, stays  
 462 within the class of matrices. Matrix multiplication, therefore, serves as a possible candidate to be  
 463 considered when consolidating equations and reducing the encoding length of a linear structural  
 464 systems. When written down in a ‘high-level’ view, matrices can be expressed in terms of single  
 465 variables  $A, B \in \mathbb{R}^{M \times N}$  and matrix multiplication  $\times : \mathbb{R}^{M \times N} \times \mathbb{R}^{N \times O} \rightarrow \mathbb{R}^{M \times O}$ . Assuming  
 466 equations  $f_Y := A \times X$  and  $f_Z := B \times X$ , we can reduce the length of the composed equation  
 467  $f'_Z := A \times B \times X$  by multiply the matrices  $A$  and  $B$  together,  $f_i = C \times X$  with  $C = A \times B$ .  
 468 While we effectively reduced the number of high-level symbols written in the equation, we are hiding  
 469 computational complexity in the structure of the matrix  $C$ . The following simple counterexample  
 470 demonstrates a situation where the size, as well as, the number of non-zero entries even increases:

$$\begin{matrix} & C & & A & & B \\ \begin{bmatrix} 0 & 1 & 1 \\ 0 & 1 & 1 \\ 0 & 1 & 1 \end{bmatrix} & = & \begin{bmatrix} 0 & 1 \\ 0 & 1 \\ 0 & 1 \end{bmatrix} & \times & \begin{bmatrix} 0 & 0 & 0 \\ 0 & 1 & 1 \end{bmatrix} \end{matrix}$$

471 Thus, proving that pure matrix multiplication, is not suitable to keep, or even minimize, the size of  
 472 composed function representations.

473 **B.3 Compression over Finite Discrete Domains**

474 Consolidation may reduce the number of variables within a graph, but burdens the remaining equations  
 475 with the complexity of the consolidated variables. Without the need to explicitly compute values of  
 476 consolidated variables, we might leverage cancellation effects to simplify equations, as outlined in  
 477 the main paper. In terms of compression, no guarantees can be given in the general case. However,  
 478 we will now show, that the often considered case of chained maps between finite discrete domains  
 479 simplifies or at least preserves complexity.

480 The cardinality of the image of a deterministic function  $f : \mathcal{X} \rightarrow \mathcal{Y}$  between two finite discrete sets  
 481  $\mathcal{X}, \mathcal{Y}$  is bounded by the cardinality of its domain:  $|\text{Img}(f)| \leq |\text{Dom}(f)| \leq |\mathcal{X}|$ , where  $\text{Img}(f)$  is  
 482 the image and  $\text{Dom}(f)$  the domain of  $f$ . In particular, the strict inequality  $|\text{Img}(f)| < |\text{Dom}(f)|$   
 483 holds for all non-injective maps. Function composition may further reduce the ‘effective’ domain  
 484  $\text{Dom}_{\text{effective}}(f)$  of a function, by only considering values of the image of the previous map as  
 485 inputs to the next function. In contrast considering to all possible values of  $\mathcal{X}$  in the case of the  
 486 non-composed map, the image of the previous function may only be a subset of  $\mathcal{X}$ . Therefore,  
 487  $f_2 \circ f_1 \Rightarrow |\text{Img}_{\text{effective}}(f_2)| \leq |\text{Dom}_{\text{effective}}(f_2)| = |\text{Img}(f_1)| \leq |\text{Dom}(f_1)|$ . In particular, the  
 488 effective image of a composition chain  $f_n \circ \dots \circ f_1$  is bounded by the function with the smallest  
 489 image:  $|\text{Img}_{\text{effective}}(f_n \circ \dots \circ f_1)| \leq \min |\text{Img}(f_i)|$ . Thus, equation chains over finite discrete  
 490 domains strictly preserve or reduce the effective size of the image, allowing for a possibly simpler  
 491 combined representation in comparison to representing the functions individually.

492 **C Reparameterization of non-deterministic structural equations.**

493 Consolidation of structural equations might lead to duplication of non-deterministic terms within  
 494 consolidated systems. For example when consolidating fork structures (compare to Sec. 4.1). Without  
 495 further precautions, different values might be sampled from the duplicated non-deterministic equa-  
 496 tions. An example where consolidating a variable  $B$  with a non-deterministic equation  $f_B$  (indicated  
 497 by a squiggly line) leads to inconsistent behaviour is shown in 5. In  $\mathcal{M}_1$ ,  $C$  and  $D$  both copy on the  
 498 value of  $B$ . Therefore,  $c = d$  yields always.  $\mathcal{M}_{1'}$  shows a graph where  $B$  is consolidated from  $\mathcal{M}_1$ .  
 499 As a result the non-deterministic equation  $f_B$  is duplicated into the equations of  $C$  and  $D$ , such that  
 500  $f_C := \text{Bern}(A)$  and  $f_D := \text{Bern}(A)$ . Within the consolidated model  $\mathcal{M}_{1'}$ , different values might be  
 501 be sampled from the different noise terms  $\text{Bern}(A)$  in  $f_C$  and  $f_D$ . Consequently  $c \neq d$  might occur  
 502 in  $\mathcal{M}_{1'}$ . To obtain consistent behaviour with the initial  $\mathcal{M}_1$ , we need to ensure agreement about the  
 503 value of  $\text{Bern}(A)$  across all instances of the duplicated equation. To do so, we reparameterize  $\mathcal{M}_1$   
 504 and explicitly store a fixed value, sampled from  $\text{Bern}(A)$ , into a new exogenous variable  $R$ . The  
 505 equation  $f_B$  is then reparameterized into a deterministic structural equation taking the variable  $R$  as  
 506 an additional argument, resulting in  $\mathcal{M}_2$ . When consolidating  $B$  within  $\mathcal{M}_2$ , all instances of  $f_B$  now  
 507 yield the same value, as the noise term is fixed via  $R$  and finally  $P_{\mathcal{M}_2} = P_{\mathcal{M}_1}$ .

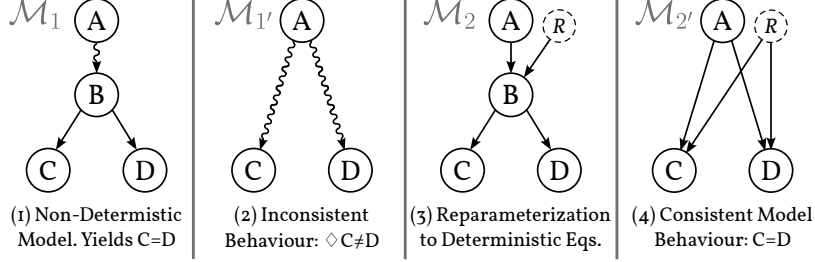

Figure 5: **Reparameterization of non-deterministic models.** The SCM  $\mathcal{M}_1$  contains a non-deterministic equation  $B := \text{Bern}(A)$  (marked with a squiggly line). With  $C := B$  and  $D := B$ ,  $\mathcal{M}_1$  always yields  $C = D$ . Simply consolidating (or marginalizing)  $B$  creates a model  $\mathcal{M}_{1'}$  with  $C := \text{Bern}(A)$  and  $D := \text{Bern}(A)$ , such that possibly  $C \neq D$ . Reparameterizing  $f_B$  by introducing an exogenous random variable  $R := \mathcal{U}(0, 1)$  and  $B := A < R$ , yields the SCM  $\mathcal{M}_2$  with only deterministic equations. Consolidating (or marginalizing)  $B$  in  $\mathcal{M}_2$  leads to  $\mathcal{M}_{2'}$  where  $C := A < R$  and  $D := A < R$ , thus always  $C = D$ .

## 508 D Consolidation Examples

509 In this section we show further detailed applications of consolidation. Section D.1 presents the worked  
 510 out consolidation of the dominoes motivating example of the paper, with regard to generalizing  
 511 abilities of consolidates models. Section D.2 considers consolidation of the classical firing squad  
 512 example. In contrast to the other examples, we focus on consolidating graphs with multiple edges  
 513 in the causal graph. Lastly we provide the causal graph and structural equations of the game agent  
 514 policy discussed in the main paper, in Section D.3.

### 515 D.1 Motivating Example: Dominoes

516 While we applied consolidation to a particular SCMs in the main paper, we will discuss the motivating  
 517 example with focus on obtaining representations that cover generalize over populations of SCM. We  
 518 demonstrate this on the particular example of a rows of dominoes, as a simple SCM with highly  
 519 homogenous structure. Regardless of whether the SCM is obtained by using methods for direct  
 520 identification of causal graphs from image data, as presented by Brehmer et al. [2022], or abstracting  
 521 physical simulation using  $\tau$ -abstractions [Beckers and Halpern, 2019]; we assume to be provided  
 522 with a binary representation of the domino stones. The state of every domino  $S_i$  indicates whether  
 523 it is standing up or getting pushed over. In this case, the structural equations for all dominoes are  
 524 the same:  $f_i := S_{i-1}$ . As a result tipping over the first stone in a row will lead to all stones falling.  
 525 Also, we are only interested in the final outcome of the chain. That is, whether the last stone will  
 526 fall or not ( $\mathbf{E} = \{S_n\}$ ). Again, we use consolidation to collapse the structural equations in the  
 527 unintervened case:  $S_n := f_n \circ \dots \circ f_1 := S_1$ . We consider a single active allowed intervention of  
 528 holding up any of the dominoes or tipping it over,  $\mathcal{I} = \{do(S_i = 0), do(S_i = 1)\}$ . Upon evaluation,  
 529 the unconsolidated model needs to check for every domino if it is being intervened or not, requiring  
 530  $n$  conditional branches. Using the fact that perfect interventions ‘overwrite’ the variable state for the  
 531 following dominoes, we introduce a first order quantifier that handles all intervention in a unified way.  
 532 Finally, by combining the formulas of the intervened and unintervened case, we find the following  
 533 simple equation:

$$S_n := \begin{cases} x_i & \text{if } \exists do(S_i = x_i) \in \mathbf{I} \\ S_1 & \text{else} \end{cases}$$

534 The resulting equation no longer has a notion of the actual number of dominoes and, in fact, it is  
 535 invariant to it. We realise that introducing the first-order for-all  $\forall$  and exists  $\exists$  quantifiers allows for a  
 536 unified representation of arbitrary chains of dominoes. Similar observations are discussed in Peters  
 537 and Halpern [2021] and Halpern and Peters [2022] which introduce generalized SEM (GSEM). As  
 538 intermediate the equations are no longer computed explicitly, the structural equations of consolidated  
 539 models for different row lengths only differ in the set of allowed interventions  $\mathcal{I}$ . That is, for a  
 540 row of three domino stones  $\mathcal{I} = \{do(V_1 = v_1), do(V_2 = v_1), do(V_3 = v_1)\}$ , while for four stones  
 541 the additional  $do(V_4 = v_1)$  is defined. As set out in the introduction of this paper, we consider

542 consolidation as a tool for obtaining more interpretable SCM. Towards this end, consolidation might  
 543 help us in detecting similar structures within an SCM. Doing so eases understanding of causal systems,  
 544 as the user only has to understand the general mechanisms of a particular SCM once and is then able  
 545 to apply the gained knowledge to all newly appearing SCM of the same type.

## 546 D.2 Firing Squad Example

547 While the dominoes and tool wear examples were mainly considering the consolidation of sequential  
 548 structures, we want to briefly demonstrate the consolidation of structural equations that are arranged  
 549 in a parallel fashion. We consider a variation of the well known firing squad example [Hopkins  
 550 and Pearl, 2007] with a variable number  $N$  of rifleman. A commander ( $C$ ) gives orders to rifleman  
 551 ( $R_i, i \in \{1 \dots N\}$ ), which shoot accurately and the prisoner ( $P$ ) dies. For the sequential stacking  
 552 of equations we found that interventions exert an ‘overwriting’ effect. That is, every intervention  
 553 fixes the value of a variable, making the unfolding of the following equations independent of  
 554 all previous computations. To yield a similar effect for parallel equations we need to block *all*  
 555 paths between the cause and effect. In this scenario, this can easily be expressed by using an  
 556 all-quantifier. When consolidating the SCM, we consider only the captain  $C$  and prisoner  $P$ ,  
 557  $\mathbf{E} = \{C, P\}$ , while allowing for any combination of interventions that prevent the rifleman from  
 558 shooting  $\mathcal{I} = \mathcal{P}(\{do(R_i = 0)\}_{i \in \{1 \dots N\}})$ . After consolidation, we obtain the following equation:

$$P := \begin{cases} \text{lives} & \text{if } C = 0 \vee (\forall S_i. do(S_i = 0) \in \mathbf{I}) \\ \text{dies} & \text{else} \end{cases}$$

559 As with the dominoes example, we are again in a situation where the consolidated equation intuitively  
 560 summarizes the effects of individual: “The prisoner lives if the captain does not give orders, or if all  
 561 riflemen are prevented from shooting”.

## 562 D.3 Revealing Agent Policy: Causal Graph and Equations

563 In this section we explicitly list the structural equations representing observed interactions between a  
 564 platformer environment and a possible rule based agent. The resulting causal graph is shown in Fig.6  
 565 at the end of the appendix. Except for the parentless variables ‘coin\_reward’, ‘powerup\_reward’,  
 566 ‘enemy\_reward’, ‘flag\_reward’, ‘player\_position’, ‘position\_coin’, ‘position\_powerup’, ‘posi-  
 567 tion\_enemy’, ‘position\_flag’ and ‘target\_flag’, which are exogenous and determined by the en-  
 568 vironment, all variables are considered endogenous:

player\_position, position\_coin, position\_powerup, position\_enemy, position\_flag  $\in [0..1]^2$

coin\_reward := 3; powerup\_reward := 1; enemy\_reward := 9; flag\_reward := 2

With  $X$  in {coin, powerup, enemy, flag} :

distance\_X := ||position\_X - player\_position\_X||<sub>2</sub>

near\_X := distance\_X < 3.0

targeting\_cost\_X := 1.0 + 0.5 × distance\_X

target\_coin := targeting\_cost\_coin < enemy\_reward

target\_powerup := targeting\_cost\_powerup < powerup\_reward

target\_enemy := targeting\_cost\_enemy < enemy\_reward ∧ powered\_up

target\_flag := True

powered\_up := target\_powerup

towards\_coin := target\_coin ∧ coin\_reward > max({X\_reward|target\_X} <sub>X ∈ {powerup, enemy, flag}</sub>)

towards\_powerup := target\_powerup ∧ powerup\_reward > max({X\_reward|target\_X} <sub>X ∈ {coin, enemy, flag}</sub>)

towards\_enemy := target\_enemy ∧ enemy\_reward > max({X\_reward|target\_X} <sub>X ∈ {enemy, powerup, flag}</sub>)

towards\_flag := target\_flag ∧ flag\_reward > max({X\_reward|target\_X} <sub>X ∈ {coin, powerup, enemy}</sub>)

jump := near\_enemy ∧ ¬powered\_up

$$\text{planning\_sequence}_i := \begin{cases} \text{finished} & \text{if } \text{towards\_flag} \quad \wedge \quad (\text{flag} \in \bigcup_{j=1}^{i-1} \text{planning\_sequence}_j) \\ \text{coin} & \text{if } \text{towards\_coin} \quad \wedge \quad (\text{coin} \notin \bigcup_{j=1}^{i-1} \text{planning\_sequence}_j) \\ \text{powerup} & \text{if } \text{towards\_powerup} \quad \wedge \quad (\text{powerup} \notin \bigcup_{j=1}^{i-1} \text{planning\_sequence}_j) \\ \text{enemy} & \text{if } \text{towards\_enemy} \quad \wedge \quad (\text{enemy} \notin \bigcup_{j=1}^{i-1} \text{planning\_sequence}_j) \\ \text{flag} & \text{if } \text{towards\_flag} \quad \wedge \quad (\text{flag} \notin \bigcup_{j=1}^{i-1} \text{planning\_sequence}_j) \\ \text{finished} & \text{else} \end{cases}$$

$$\begin{aligned} \text{score} &:= 20 - \text{time\_taken} \\ &+ \text{coin\_reward} \text{ if } \text{coin} \in \text{planning\_sequence}_i \\ &+ \text{powerup\_reward} \text{ if } \text{powerup} \in \text{planning\_sequence}_i \\ &+ \text{enemy\_reward} \text{ if } \text{enemy} \in \text{planning\_sequence}_i \wedge \text{powerup} \in \text{planning\_sequence}_i \\ &+ \text{flag\_reward} \text{ if } \text{flag} \in \text{planning\_sequence}_i \end{aligned}$$

## 571 E Mathematical symbols and notation

572 The following table contains mathematical functions and notation used throughout the paper.

| Notation                                   | Meaning                                                                               |
|--------------------------------------------|---------------------------------------------------------------------------------------|
| $X; \mathbf{X}$                            | A (set of) variable(s).                                                               |
| $x; \mathbf{x}$                            | Value(s) of $X; \mathbf{X}$ .                                                         |
| $\mathbf{X}_i$                             | The $i$ -th variable of $\mathbf{X}$ .                                                |
| $\mathbf{X}_S$                             | The subset $\{\mathbf{X}_i : i \in S\}$ of $\mathbf{X}$ .                             |
| $P_{\mathbf{X}}$                           | A probability distribution over variables $\mathbf{X}$ .                              |
| $x \sim P_X$                               | A value $x$ sampled from a distribution over $X$ .                                    |
| $\mathcal{P}(\cdot)$                       | The power set.                                                                        |
| $f \circ g$                                | Function composition, $(f \circ g)(x) = f(g(x))$ .                                    |
| $\prod_{X_i \in \mathbf{X}} \mathcal{X}_i$ | $N$ -ary Cartesian product over the domain of $\mathbf{X}$ .                          |
| $\ \cdot\ _2$                              | $l^2$ vector norm.                                                                    |
| $\mathcal{U}(a, b)$                        | Uniform Distribution.                                                                 |
| $\mathcal{N}(\mu, \sigma^2)$               | Normal Distribution.                                                                  |
| $\text{Bern}(p)$                           | Bernoulli distribution; Takes value 1 with probability $p$ and 0 otherwise.           |
| $P_{\mathcal{M}}$                          | Probability distribution over the SCM $\mathcal{M}$ .                                 |
| $P_{\mathcal{M}}^{\mathbf{I}}$             | Probability distribution over the SCM $\mathcal{M}$ under intervention $\mathbf{I}$ . |
| $V_i$                                      | An endogenous variable of an SCM $\mathcal{M}$ .                                      |
| $U_i$                                      | An exogenous variable of an SCM $\mathcal{M}$ .                                       |
| $f_i$                                      | Structural equation of the variable $X_i$ .                                           |

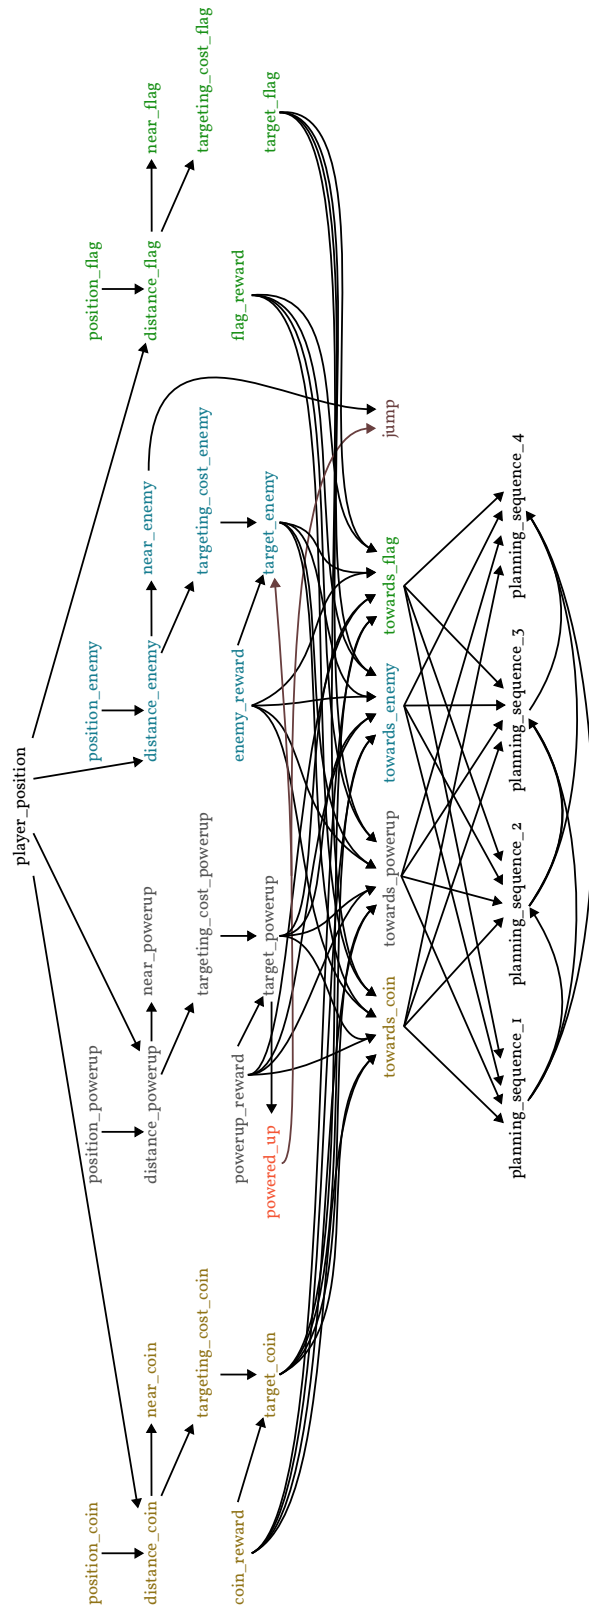

Figure 6: **Causal graph of an agent policy.** The causal graph of a greedy agent inside an platformer environment. The parentless variables are exogenous. Their value is determined via the game environment. The final 'score' variable is left out for clarity.
